# Supplementary material for: Chemical depolymerization of lignin involving the redistribution mechanism with phenols and repolymerization of depolymerized products
Source: Royal Society of Chemistry journal article supplement (doi:10.1039/c3gc41708e), 2013-11-11
Supplement: c3gc41708e.pdf [file c3gc41708e.pdf]

## Supporting Information

### Chemical depolymerization of lignin involving the redistribution mechanism with phenols and repolymerization of depolymerized products

Sepa Nanayakkara, Antonio F. Patti, Kei Saito\*

*School of Chemistry, Monash University, Wellington Rd, Clayton, VIC 3800, Australia.*

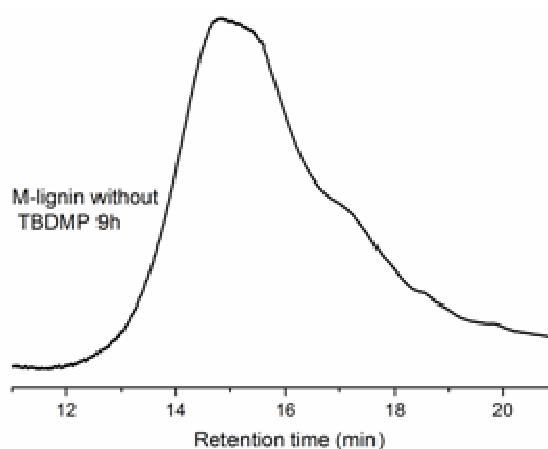

**Figure S1.** GPC chromatograms of depolymerization of M-lignin in aqueous condition without TBDMP (control reaction ) 9h

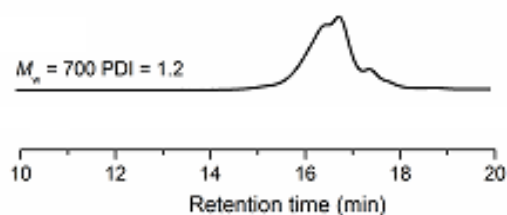

**Figure S2.** GPC chromatograms of Fractions obtained from recycling GPC, 5 mg of 9h depolymerised sample was dissolved in 1 mL of DMF and injected to the recycling GPC.

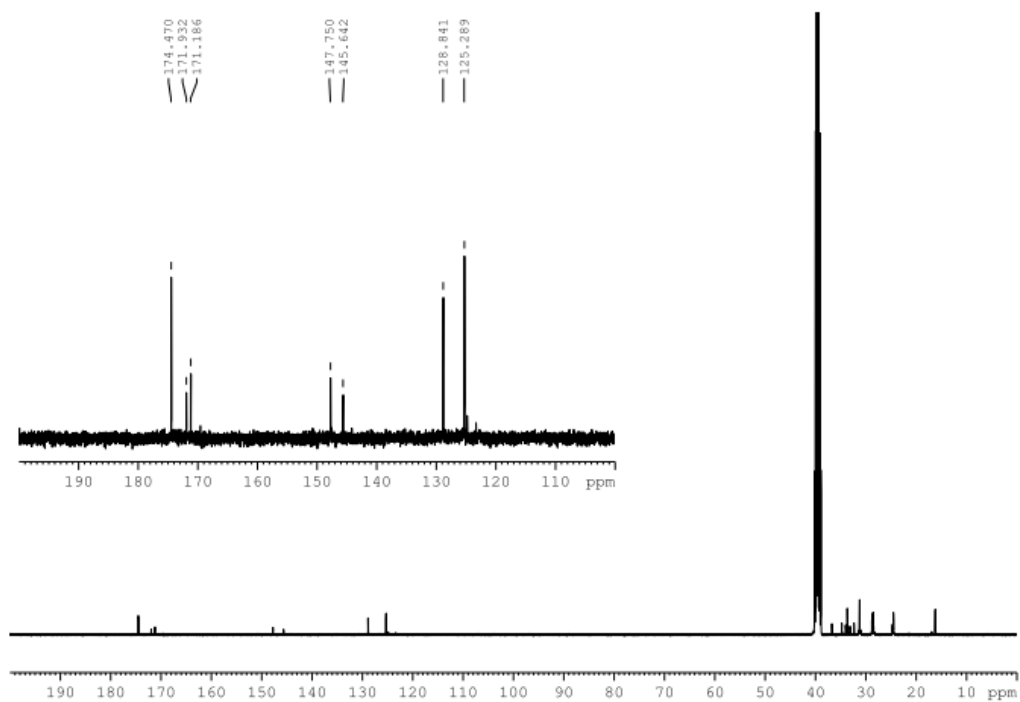

**Fig S3.** <sup>13</sup>C NMR spectra of lignin based polyester in DMSO-*d*<sub>6</sub> using Bruker DRK-400 spectrometer
